# Supplementary material for: Structures of immature EIAV Gag lattices reveal a conserved role for IP6 in lentivirus assembly
Source: PubMed Central journal article supplement (PMC7004409; doi:10.1371/journal.ppat.1008277), 2020-01-27
Supplement: ppat.1008277.s009.pdf [file ppat.1008277.s009.pdf]

| Sample                                   |                                                | EIAV Gag $\Delta$ MA spheres pH6 | EIAV Gag $\Delta$ MA tubes pH6 | EIAV Gag $\Delta$ MA spheres pH8 | EIAV Gag $\Delta$ MA tubes pH8 |
|------------------------------------------|------------------------------------------------|----------------------------------|--------------------------------|----------------------------------|--------------------------------|
| <b>Acquisition settings</b>              | <b>Microscope</b>                              | FEI Titan Krios                  | FEI Titan Krios                | FEI Titan Krios                  | FEI Titan Krios                |
|                                          | <b>Voltage (keV)</b>                           | 300                              | 300                            | 300                              | 300                            |
|                                          | <b>Detector</b>                                | Gatan Quantum K2                 | Gatan Quantum K2               | Gatan Quantum K2                 | Gatan Quantum K2               |
|                                          | <b>Energy-filter</b>                           | Yes                              | Yes                            | Yes                              | Yes                            |
|                                          | <b>Slit width (eV)</b>                         | 20                               | 20                             | 20                               | 20                             |
|                                          | <b>Super-resolution mode</b>                   | Yes                              | Yes                            | Yes                              | Yes                            |
|                                          | <b>Å/pixel</b>                                 | 1.041                            | 1.041                          | 1.35                             | 1.35                           |
|                                          | <b>Defocus range (microns)</b>                 | -1.5 to -3.5                     | -1.5 to -3.5                   | -1.5 to -5.0                     | -1.5 to -5.0                   |
|                                          | <b>Defocus step (microns)</b>                  | 0.25                             | 0.25                           | 0.25                             | 0.25                           |
|                                          | <b>Acquisition scheme</b>                      | -60/60°, 3°, Serial EM           | -60/60°, 3°, Serial EM         | -60/60°, 3°, Serial EM           | -60/60°, 3°, Serial EM         |
|                                          | <b>Total Dose (electrons/Å<sup>2</sup>)</b>    | ~140                             | ~140                           | ~140                             | ~140                           |
|                                          | <b>Dose rate (electrons/Å<sup>2</sup>/sec)</b> | ~2.5                             | ~2.5                           | ~2.5                             | ~2.5                           |
|                                          | <b>Frame number</b>                            | 21                               | 21                             | 20                               | 20                             |
|                                          | <b>Tomogram number</b>                         | 40                               | 20                             | 55                               | 56                             |
|                                          | <b>Processing settings</b>                     | <b>VLPs</b>                      | 175                            | 152                              | 158                            |
| <b>Asymmetric units</b>                  |                                                | 389,766                          | 225,858                        | 394,842                          | 179,720                        |
| <b>B-factor used for sharpening</b>      |                                                | -270                             | -150                           | -245                             | -150                           |
| <b>Final resolution (0.143 FSC) in Å</b> |                                                | 3.7                              | 3.8                            | 3.9                              | 3.7                            |
