# Supplementary material for: Structures of immature EIAV Gag lattices reveal a conserved role for IP6 in lentivirus assembly
Source: PubMed Central journal article supplement (PMC7004409; doi:10.1371/journal.ppat.1008277), 2020-01-27
Supplement: ppat.1008277.s010.pdf [file ppat.1008277.s010.pdf]

---

| <b>Refinement</b>                                     | <b>EIAV Gag<math>\Delta</math>MA<br/>spheres pH6<br/>residues 143-359</b> | <b>EIAV Gag<math>\Delta</math>MA<br/>tubes pH6<br/>residues 143-359</b> | <b>EIAV Gag<math>\Delta</math>MA<br/>tubes pH8<br/>residues 143-359</b> |
|-------------------------------------------------------|---------------------------------------------------------------------------|-------------------------------------------------------------------------|-------------------------------------------------------------------------|
| <b>Resolution of map (<math>\text{\AA}</math>)</b>    | 3.7                                                                       | 3.8                                                                     | 3.7                                                                     |
| <b>Number of CA-SP monomers</b>                       | 1                                                                         | 3                                                                       | 3                                                                       |
| <b>All-atom clash score</b>                           | 6.78                                                                      | 2.91                                                                    | 5.91                                                                    |
| <b>Favored rotamers</b>                               | 93.58%                                                                    | 91.27%                                                                  | 89.30%                                                                  |
| <b>Ramachandran outliers<br/>(number of residues)</b> | 0                                                                         | 0.31% (2)                                                               | 0                                                                       |
| <b>Ramachandran favoured</b>                          | 93.95%                                                                    | 92.71%                                                                  | 91.94%                                                                  |
| <b>C-beta deviations</b>                              | 0                                                                         | 0                                                                       | 0                                                                       |
| <b>Rmsd (angles, degrees)</b>                         | 0.861                                                                     | 0.839                                                                   | 0.917                                                                   |
| <b>Rmsd (bonds, <math>\text{\AA}</math>)</b>          | 0.006                                                                     | 0.005                                                                   | 0.006                                                                   |

---
